# Supplementary material for: Antibiotic perturbation of gut bacteria does not significantly alter host responses to ocular disease in a songbird species
Source: PeerJ. 2022 Jun 10;10:e13559. doi: 10.7717/peerj.13559 (PMC9190666; doi:10.7717/peerj.13559)
Supplement: Supplemental Information 3 [file peerj-10-13559-s003.xlsx]

## Sheet: masterdata
Date	PID	Bird	Sex	L eye score	R eye score	Treatment	MG_Treatment01	Ab_Treatment01	MGC2_log	RawELISA
2020-09-30	-12	1925	M	0	0	MG	1	0
2020-09-30	-12	1926	F	0	0	Both	1	1
2020-09-30	-12	1928	M	0	0	MG	1	0
2020-09-30	-12	1930	F	0	0	Both	1	1
2020-09-30	-12	1933	M	0	0	MG	1	0
2020-09-30	-12	1936	F	0	0	Control	0	0
2020-09-30	-12	1939	M	0	0	Ab	0	1
2020-09-30	-12	1941	F	0	0	MG	1	0
2020-09-30	-12	1946	M	0	0	Both	1	1
2020-09-30	-12	1952	M	0	0	MG	1	0
2020-09-30	-12	1954	F	0	0	Ab	0	1
2020-09-30	-12	1955	F	0	0	Control	0	0
2020-09-30	-12	1957	F	0	0	Both	1	1
2020-09-30	-12	1958	F	0	0	MG	1	0
2020-09-30	-12	1966	M	0	0	Both	1	1
2020-09-30	-12	1968	M	0	0	Ab	0	1
2020-09-30	-12	1977	F	0	0	MG	1	0
2020-09-30	-12	1982	M	0	0	Both	1	1
2020-09-30	-12	1987	M	0	0	Control	0	0
2020-09-30	-12	1989	M	0	0	MG	1	0
2020-09-30	-12	2065	F	0	0	Both	1	1
2020-09-30	-12	2068	M	0	0	Both	1	1
2020-09-30	-12	2070	M	0	0	MG	1	0
2020-09-30	-12	2071	F	0	0	Both	1	1
2020-09-30	-12	2073	F	0	0	MG	1	0
2020-09-30	-12	2076	M	0	0	Both	1	1
2020-09-30	-12	2082	F	0	0	MG	1	0
2020-09-30	-12	2083	F	0	0	Control	0	0
2020-09-30	-12	2085	M	0	0	Ab	0	1
2020-09-30	-12	2092	M	0	0	Both	1	1
2020-09-30	-12	2094	F	0	0	MG	1	0
2020-09-30	-12	2095	M	0	0	Control	0	0
2020-09-30	-12	2097	F	0	0	MG	1	0
2020-09-30	-12	2098	M	0	0	Ab	0	1
2020-09-30	-12	2099	F	0	0	Both	1	1
2020-09-30	-12	2202	M	0	0	Both	1	1
2020-09-30	-12	2203	M	0	0	MG	1	0
2020-09-30	-12	2204	F	0	0	Ab	0	1
2020-09-30	-12	2205	M	0	0	Control	0	0
2020-09-30	-12	2206	M	0	0	Control	0	0
2020-09-30	-12	2207	F	0	0	Both	1	1
2020-09-30	-12	2208	M	0	0	MG	1	0
2020-09-30	-12	2211	F	0	0	Ab	0	1
2020-09-30	-12	2214	F	0	0	Both	1	1
2020-09-30	-12	2215	F	0	0	MG	1	0
2020-09-30	-12	2216	M	0	0	Both	1	1
2020-09-30	-12	2222	M	0	0	Both	1	1
2020-09-30	-12	2223	M	0	0	MG	1	0
2020-09-30	-12	2225	F	0	0	Ab	0	1
2020-09-30	-12	2226	F	0	0	Control	0	0
2020-10-12	-1	1925	M	0	0	MG	1	0	0
2020-10-12	-1	1926	F	0	0	Both	1	1	0
2020-10-12	-1	1928	M	0	0	MG	1	0	0
2020-10-12	-1	1930	F	0	0	Both	1	1
2020-10-12	-1	1933	M	0	0	MG	1	0
2020-10-12	-1	1936	F	0	0	Control	0	0
2020-10-12	-1	1939	M	0	0	Ab	0	1
2020-10-12	-1	1941	F	0	0	MG	1	0
2020-10-12	-1	1946	M	0	0	Both	1	1
2020-10-12	-1	1952	M	0	0	MG	1	0
2020-10-12	-1	1954	F	0	0	Ab	0	1
2020-10-12	-1	1955	F	0	0	Control	0	0
2020-10-12	-1	1957	F	0	0	Both	1	1	0
2020-10-12	-1	1958	F	0	0	MG	1	0
2020-10-12	-1	1966	M	0	0	Both	1	1	0
2020-10-12	-1	1968	M	0	0	Ab	0	1
2020-10-12	-1	1977	F	0	0	MG	1	0	0
2020-10-12	-1	1982	M	0	0	Both	1	1	0
2020-10-12	-1	1987	M	0	0	Control	0	0
2020-10-12	-1	1989	M	0	0	MG	1	0	0
2020-10-12	-1	2065	F	0	0	Both	1	1
2020-10-12	-1	2068	M	0	0	Both	1	1	0
2020-10-12	-1	2070	M	0	0	MG	1	0
2020-10-12	-1	2071	F	0	0	Both	1	1	0
2020-10-12	-1	2073	F	0	0	MG	1	0	0
2020-10-12	-1	2076	M	0	0	Both	1	1
2020-10-12	-1	2082	F	0	0	MG	1	0
2020-10-12	-1	2083	F	0	0	Control	0	0
2020-10-12	-1	2085	M	0	0	Ab	0	1
2020-10-12	-1	2092	M	0	0	Both	1	1	0
2020-10-12	-1	2094	F	0	0	MG	1	0	0
2020-10-12	-1	2095	M	0	0	Control	0	0
2020-10-12	-1	2097	F	0	0	MG	1	0
2020-10-12	-1	2098	M	0	0	Ab	0	1
2020-10-12	-1	2099	F	0	0	Both	1	1
2020-10-12	-1	2202	M	0	0	Both	1	1
2020-10-12	-1	2203	M	0	0	MG	1	0	0
2020-10-12	-1	2204	F	0	0	Ab	0	1
2020-10-12	-1	2205	M	0	0	Control	0	0
2020-10-12	-1	2206	M	0	0	Control	0	0
2020-10-12	-1	2207	F	0	0	Both	1	1	0
2020-10-12	-1	2208	M	0	0	MG	1	0
2020-10-12	-1	2211	F	0	0	Ab	0	1
2020-10-12	-1	2214	F	0	0	Both	1	1
2020-10-12	-1	2215	F	0	0	MG	1	0	0
2020-10-12	-1	2216	M	0	0	Both	1	1
2020-10-12	-1	2222	M	0	0	Both	1	1
2020-10-12	-1	2223	M	0	0	MG	1	0
2020-10-12	-1	2225	F	0	0	Ab	0	1
2020-10-12	-1	2226	F	0	0	Control	0	0
2020-10-13	0	1925	M			MG	1	0
2020-10-13	0	1926	F			Both	1	1
2020-10-13	0	1928	M			MG	1	0
2020-10-13	0	1930	F			Both	1	1
2020-10-13	0	1933	M			MG	1	0
2020-10-13	0	1936	F			Control	0	0
2020-10-13	0	1939	M			Ab	0	1
2020-10-13	0	1941	F			MG	1	0
2020-10-13	0	1946	M			Both	1	1
2020-10-13	0	1952	M			MG	1	0
2020-10-13	0	1954	F			Ab	0	1
2020-10-13	0	1955	F			Control	0	0
2020-10-13	0	1957	F			Both	1	1
2020-10-13	0	1958	F			MG	1	0
2020-10-13	0	1966	M			Both	1	1
2020-10-13	0	1968	M			Ab	0	1
2020-10-13	0	1977	F			MG	1	0
2020-10-13	0	1982	M			Both	1	1
2020-10-13	0	1987	M			Control	0	0
2020-10-13	0	1989	M			MG	1	0
2020-10-13	0	2065	F			Both	1	1
2020-10-13	0	2068	M			Both	1	1
2020-10-13	0	2070	M			MG	1	0
2020-10-13	0	2071	F			Both	1	1
2020-10-13	0	2073	F			MG	1	0
2020-10-13	0	2076	M			Both	1	1
2020-10-13	0	2082	F			MG	1	0
2020-10-13	0	2083	F			Control	0	0
2020-10-13	0	2085	M			Ab	0	1
2020-10-13	0	2092	M			Both	1	1
2020-10-13	0	2094	F			MG	1	0
2020-10-13	0	2095	M			Control	0	0
2020-10-13	0	2097	F			MG	1	0
2020-10-13	0	2098	M			Ab	0	1
2020-10-13	0	2099	F			Both	1	1
2020-10-13	0	2202	M			Both	1	1
2020-10-13	0	2203	M			MG	1	0
2020-10-13	0	2204	F			Ab	0	1
2020-10-13	0	2205	M			Control	0	0
2020-10-13	0	2206	M			Control	0	0
2020-10-13	0	2207	F			Both	1	1
2020-10-13	0	2208	M			MG	1	0
2020-10-13	0	2211	F			Ab	0	1
2020-10-13	0	2214	F			Both	1	1
2020-10-13	0	2215	F			MG	1	0
2020-10-13	0	2216	M			Both	1	1
2020-10-13	0	2222	M			Both	1	1
2020-10-13	0	2223	M			MG	1	0
2020-10-13	0	2225	F			Ab	0	1
2020-10-13	0	2226	F			Control	0	0
2020-10-16	3	1925	M	0	0	MG	1	0
2020-10-16	3	1926	F	0	0	Both	1	1
2020-10-16	3	1928	M	0.5	0	MG	1	0	4.038
2020-10-16	3	1930	F	0	0	Both	1	1
2020-10-16	3	1933	M	0	0.5	MG	1	0
2020-10-16	3	1936	F	0	0	Control	0	0	0
2020-10-16	3	1939	M	0	0	Ab	0	1	0.678
2020-10-16	3	1941	F	0	0	MG	1	0
2020-10-16	3	1946	M	0	0	Both	1	1
2020-10-16	3	1952	M	0.5	0	MG	1	0
2020-10-16	3	1954	F	0	0	Ab	0	1	0
2020-10-16	3	1955	F	0	0	Control	0	0	1.054
2020-10-16	3	1957	F	0	0	Both	1	1	3.562
2020-10-16	3	1958	F	0	0	MG	1	0	3.476
2020-10-16	3	1966	M	0	0	Both	1	1	3.785
2020-10-16	3	1968	M	0	0	Ab	0	1	0.667
2020-10-16	3	1977	F	0	0	MG	1	0	4.577
2020-10-16	3	1982	M	0	0	Both	1	1	3.66
2020-10-16	3	1987	M	0	0	Control	0	0	0
2020-10-16	3	1989	M	0	0	MG	1	0	4.004
2020-10-16	3	2065	F	0	0	Both	1	1	3.608
2020-10-16	3	2068	M	0.5	0	Both	1	1
2020-10-16	3	2070	M	0	0	MG	1	0
2020-10-16	3	2071	F	0	0	Both	1	1	2.608
2020-10-16	3	2073	F	0	0.5	MG	1	0
2020-10-16	3	2076	M	0	0	Both	1	1
2020-10-16	3	2082	F	0	0	MG	1	0	3.531
2020-10-16	3	2083	F	0	0	Control	0	0	1.051
2020-10-16	3	2085	M	0	0	Ab	0	1	0.51
2020-10-16	3	2092	M	0	0	Both	1	1	3.731
2020-10-16	3	2094	F	0	0	MG	1	0
2020-10-16	3	2095	M	0	0	Control	0	0	0.527
2020-10-16	3	2097	F	0.5	0.5	MG	1	0	4.327
2020-10-16	3	2098	M	0	0	Ab	0	1	0.888
2020-10-16	3	2099	F	0	0	Both	1	1	2.551
2020-10-16	3	2202	M	0	0	Both	1	1	4.558
2020-10-16	3	2203	M	0	0.5	MG	1	0	3.891
2020-10-16	3	2204	F	0	0	Ab	0	1	0.993
2020-10-16	3	2205	M	0	0	Control	0	0	0.331
2020-10-16	3	2206	M	0	0	Control	0	0	0
2020-10-16	3	2207	F	0	0	Both	1	1	3.621
2020-10-16	3	2208	M	0	0	MG	1	0	4.592
2020-10-16	3	2211	F	0	0	Ab	0	1	1.009
2020-10-16	3	2214	F	0	0	Both	1	1
2020-10-16	3	2215	F	0	0	MG	1	0	3.061
2020-10-16	3	2216	M	0	0	Both	1	1	3.647
2020-10-16	3	2222	M	0	0	Both	1	1
2020-10-16	3	2223	M	0	0	MG	1	0	3.058
2020-10-16	3	2225	F	0	0	Ab	0	1	1.663
2020-10-16	3	2226	F	0	0	Control	0	0	1.664
2020-10-20	7	1925	M	1	1	MG	1	0
2020-10-20	7	1926	F	0.5	0.5	Both	1	1	4.249
2020-10-20	7	1928	M	1.5	1	MG	1	0	4.635
2020-10-20	7	1930	F	1	1	Both	1	1
2020-10-20	7	1933	M	1.5	1	MG	1	0
2020-10-20	7	1936	F	0	0	Control	0	0
2020-10-20	7	1939	M	0	0	Ab	0	1
2020-10-20	7	1941	F	0	0	MG	1	0
2020-10-20	7	1946	M	0	0	Both	1	1	4.689
2020-10-20	7	1952	M	1	0.5	MG	1	0
2020-10-20	7	1954	F	0	0	Ab	0	1
2020-10-20	7	1955	F	0	0	Control	0	0
2020-10-20	7	1957	F	1	1	Both	1	1	4.552
2020-10-20	7	1958	F	1.5	2	MG	1	0	5.075
2020-10-20	7	1966	M	0.5	0.5	Both	1	1	4.206
2020-10-20	7	1968	M	0	0	Ab	0	1
2020-10-20	7	1977	F	1.5	1.5	MG	1	0
2020-10-20	7	1982	M	1	0	Both	1	1
2020-10-20	7	1987	M	0	0	Control	0	0
2020-10-20	7	1989	M	1	0.5	MG	1	0	4.192
2020-10-20	7	2065	F	0.5	1	Both	1	1
2020-10-20	7	2068	M	1	0.5	Both	1	1
2020-10-20	7	2070	M	0.5	0.5	MG	1	0	4.465
2020-10-20	7	2071	F	0	0	Both	1	1
2020-10-20	7	2073	F	0.5	0.5	MG	1	0	4.641
2020-10-20	7	2076	M	1	0.5	Both	1	1	4.012
2020-10-20	7	2082	F	0.5	0.5	MG	1	0
2020-10-20	7	2083	F	0	0	Control	0	0
2020-10-20	7	2085	M	0	0	Ab	0	1
2020-10-20	7	2092	M	0.5	0.5	Both	1	1
2020-10-20	7	2094	F	2	1.5	MG	1	0	4.825
2020-10-20	7	2095	M	0	0	Control	0	0
2020-10-20	7	2097	F	2	1	MG	1	0	4.487
2020-10-20	7	2098	M	0	0	Ab	0	1
2020-10-20	7	2099	F	0.5	0.5	Both	1	1	4.982
2020-10-20	7	2202	M	0	0	Both	1	1
2020-10-20	7	2203	M	1	1	MG	1	0
2020-10-20	7	2204	F	0	0	Ab	0	1
2020-10-20	7	2205	M	0	0	Control	0	0
2020-10-20	7	2206	M	0	0	Control	0	0
2020-10-20	7	2207	F	1.5	2.5	Both	1	1	4.647
2020-10-20	7	2208	M	1	1	MG	1	0	4.741
2020-10-20	7	2211	F	0	0	Ab	0	1
2020-10-20	7	2214	F	0	0	Both	1	1	1.482
2020-10-20	7	2215	F	1	1.5	MG	1	0	4.727
2020-10-20	7	2216	M	0	0	Both	1	1	4.576
2020-10-20	7	2222	M	0.5	1	Both	1	1	4.069
2020-10-20	7	2223	M	1.5	1	MG	1	0	4.457
2020-10-20	7	2225	F	0	0	Ab	0	1
2020-10-20	7	2226	F	0	0	Control	0	0
2020-10-26	13	1925	M	0.5	0.5	MG	1	0	2.842
2020-10-26	13	1926	F	0	0	Both	1	1
2020-10-26	13	1928	M	1	1	MG	1	0
2020-10-26	13	1930	F	1	1	Both	1	1
2020-10-26	13	1933	M	0.5	0.5	MG	1	0	1.891
2020-10-26	13	1936	F	0	0	Control	0	0
2020-10-26	13	1939	M	0	0	Ab	0	1
2020-10-26	13	1941	F	0	0	MG	1	0	2.209
2020-10-26	13	1946	M	0.5	0	Both	1	1	4.295
2020-10-26	13	1952	M	2.5	2	MG	1	0	4.589
2020-10-26	13	1954	F	0	0	Ab	0	1
2020-10-26	13	1955	F	0	0	Control	0	0
2020-10-26	13	1957	F	1.5	1.5	Both	1	1	4.364
2020-10-26	13	1958	F	1.5	3	MG	1	0	3.472
2020-10-26	13	1966	M	1.5	1.5	Both	1	1
2020-10-26	13	1968	M	0	0	Ab	0	1
2020-10-26	13	1977	F	1.5	3	MG	1	0	3.958
2020-10-26	13	1982	M	1.5	1	Both	1	1
2020-10-26	13	1987	M	0	0	Control	0	0
2020-10-26	13	1989	M	0	0	MG	1	0	2.097
2020-10-26	13	2065	F	1.5	1.5	Both	1	1
2020-10-26	13	2068	M	1.5	1	Both	1	1	3.559
2020-10-26	13	2070	M	1	1.5	MG	1	0
2020-10-26	13	2071	F	0.5	0	Both	1	1	2.877
2020-10-26	13	2073	F	0.5	0	MG	1	0
2020-10-26	13	2076	M	0.5	0	Both	1	1
2020-10-26	13	2082	F	0.5	0.5	MG	1	0
2020-10-26	13	2083	F	0	0	Control	0	0
2020-10-26	13	2085	M	0	0	Ab	0	1
2020-10-26	13	2092	M	2	3	Both	1	1	5.141
2020-10-26	13	2094	F	1.5	1.5	MG	1	0	2.595
2020-10-26	13	2095	M	0	0	Control	0	0
2020-10-26	13	2097	F	3	2	MG	1	0
2020-10-26	13	2098	M	0	0	Ab	0	1
2020-10-26	13	2099	F	0	0	Both	1	1	2.161
2020-10-26	13	2202	M	1	1	Both	1	1	5.049
2020-10-26	13	2203	M	0.5	1	MG	1	0
2020-10-26	13	2204	F	0	0	Ab	0	1
2020-10-26	13	2205	M	0	0	Control	0	0
2020-10-26	13	2206	M	0	0	Control	0	0
2020-10-26	13	2207	F	1	3	Both	1	1	3.255
2020-10-26	13	2208	M	0.5	0.5	MG	1	0
2020-10-26	13	2211	F	0	0	Ab	0	1
2020-10-26	13	2214	F	0	0	Both	1	1	1.712
2020-10-26	13	2215	F	2	2	MG	1	0	4.958
2020-10-26	13	2216	M	0	0	Both	1	1	2.356
2020-10-26	13	2222	M	1	0.5	Both	1	1
2020-10-26	13	2223	M	0.5	0.5	MG	1	0	2.713
2020-10-26	13	2225	F	0	0	Ab	0	1
2020-10-26	13	2226	F	0	0	Control	0	0
2020-11-02	20	1925	M	0	0.5	MG	1	0		0.07
2020-11-02	20	1926	F	0	0	Both	1	1		0.06
2020-11-02	20	1928	M	0	0	MG	1	0		0.095
2020-11-02	20	1930	F	0.5	1	Both	1	1		0.092
2020-11-02	20	1933	M	0.5	0	MG	1	0		0.075
2020-11-02	20	1936	F	0	0	Control	0	0		0.049
2020-11-02	20	1939	M	0	0	Ab	0	1		0.055
2020-11-02	20	1941	F	0	0	MG	1	0		0.136
2020-11-02	20	1946	M	0	0	Both	1	1		0.107
2020-11-02	20	1952	M	2	3	MG	1	0		0.104
2020-11-02	20	1954	F	0	0	Ab	0	1		0.052
2020-11-02	20	1955	F	0	0	Control	0	0		0.049
2020-11-02	20	1957	F	2	2	Both	1	1		0.11
2020-11-02	20	1958	F	0	1.5	MG	1	0		0.101
2020-11-02	20	1966	M	1.5	1	Both	1	1		0.087
2020-11-02	20	1968	M	0	0	Ab	0	1		0.058
2020-11-02	20	1977	F	1.5	2	MG	1	0		0.111
2020-11-02	20	1982	M	0.5	0	Both	1	1		0.083
2020-11-02	20	1987	M	0	0	Control	0	0		0.05
2020-11-02	20	1989	M	0	0	MG	1	0		0.069
2020-11-02	20	2065	F	1	1	Both	1	1		0.086
2020-11-02	20	2068	M	0.5	0	Both	1	1		0.075
2020-11-02	20	2070	M	0	1.5	MG	1	0		0.063
2020-11-02	20	2071	F	0	0	Both	1	1
2020-11-02	20	2073	F	0	0	MG	1	0
2020-11-02	20	2076	M	0.5	0	Both	1	1
2020-11-02	20	2082	F	0	0	MG	1	0		0.105
2020-11-02	20	2083	F	0	0	Control	0	0		0.064
2020-11-02	20	2085	M	0	0	Ab	0	1
2020-11-02	20	2092	M	1	1.5	Both	1	1		0.126
2020-11-02	20	2094	F	0.5	0	MG	1	0		0.095
2020-11-02	20	2095	M	0	0	Control	0	0		0.052
2020-11-02	20	2097	F	2	2	MG	1	0		0.103
2020-11-02	20	2098	M	0	0	Ab	0	1		0.054
2020-11-02	20	2099	F	0	0	Both	1	1		0.079
2020-11-02	20	2202	M	1	1	Both	1	1		0.1
2020-11-02	20	2203	M	0	0	MG	1	0		0.088
2020-11-02	20	2204	F	0	0	Ab	0	1		0.051
2020-11-02	20	2205	M	0	0	Control	0	0		0.056
2020-11-02	20	2206	M	0	0	Control	0	0
2020-11-02	20	2207	F	0	1.5	Both	1	1		0.119
2020-11-02	20	2208	M	1	1	MG	1	0
2020-11-02	20	2211	F	0	0	Ab	0	1		0.05
2020-11-02	20	2214	F	0	0	Both	1	1		0.055
2020-11-02	20	2215	F	1	1	MG	1	0		0.123
2020-11-02	20	2216	M	0	0	Both	1	1		0.075
2020-11-02	20	2222	M	0	0	Both	1	1		0.115
2020-11-02	20	2223	M	0	0.5	MG	1	0		0.077
2020-11-02	20	2225	F	0	0	Ab	0	1		0.051
2020-11-02	20	2226	F	0	0	Control	0	0		0.051
2020-11-09	27	1925	M	0	0	MG	1	0
2020-11-09	27	1926	F	0	0	Both	1	1
2020-11-09	27	1928	M	0	0	MG	1	0
2020-11-09	27	1930	F	0.5	0.5	Both	1	1
2020-11-09	27	1933	M	0	0	MG	1	0
2020-11-09	27	1936	F	0	0	Control	0	0
2020-11-09	27	1939	M	0	0	Ab	0	1
2020-11-09	27	1941	F	0	0	MG	1	0
2020-11-09	27	1946	M	0	0	Both	1	1
2020-11-09	27	1952	M	2	2	MG	1	0
2020-11-09	27	1954	F	0	0	Ab	0	1
2020-11-09	27	1955	F	0	0	Control	0	0
2020-11-09	27	1957	F	1	1	Both	1	1
2020-11-09	27	1958	F	0	0	MG	1	0
2020-11-09	27	1966	M	0.5	0.5	Both	1	1
2020-11-09	27	1968	M	0	0	Ab	0	1
2020-11-09	27	1977	F	1	0.5	MG	1	0
2020-11-09	27	1982	M	0	0	Both	1	1
2020-11-09	27	1987	M	0	0	Control	0	0
2020-11-09	27	1989	M	0	0	MG	1	0
2020-11-09	27	2065	F	0	0.5	Both	1	1
2020-11-09	27	2068	M	0	0	Both	1	1
2020-11-09	27	2070	M	0.5	0	MG	1	0
2020-11-09	27	2071	F	0	0	Both	1	1
2020-11-09	27	2073	F	0	0	MG	1	0
2020-11-09	27	2076	M	0	0	Both	1	1
2020-11-09	27	2082	F	0	0	MG	1	0
2020-11-09	27	2083	F	0	0	Control	0	0
2020-11-09	27	2085	M	0	0	Ab	0	1
2020-11-09	27	2092	M	0	0	Both	1	1
2020-11-09	27	2094	F	0	0.5	MG	1	0
2020-11-09	27	2095	M	0	0	Control	0	0
2020-11-09	27	2097	F	1.5	0.5	MG	1	0
2020-11-09	27	2098	M	0	0	Ab	0	1
2020-11-09	27	2099	F	0	0	Both	1	1
2020-11-09	27	2202	M	1	1.5	Both	1	1
2020-11-09	27	2203	M	0	0.5	MG	1	0
2020-11-09	27	2204	F	0	0	Ab	0	1
2020-11-09	27	2205	M	0	0	Control	0	0
2020-11-09	27	2206	M	0	0	Control	0	0
2020-11-09	27	2207	F	0	0	Both	1	1
2020-11-09	27	2208	M	0	0.5	MG	1	0
2020-11-09	27	2211	F	0	0	Ab	0	1
2020-11-09	27	2214	F	0	0	Both	1	1
2020-11-09	27	2215	F	1	1.5	MG	1	0
2020-11-09	27	2216	M	0	0	Both	1	1
2020-11-09	27	2222	M	0	0	Both	1	1
2020-11-09	27	2223	M	0	0.5	MG	1	0
2020-11-09	27	2225	F	0	0	Ab	0	1
2020-11-09	27	2226	F	0	0	Control	0	0

## Sheet: Column Descriptions
Column	Description
Date	day-month-year
PID	post-inoculation day
Bird	unique bird identifier
Sex	male, female
L eye score	left eye conjunctivitus pathology score, 0–3
R eye score	right eye conjunctivitus pathology score, 0–3
Treatment	treatment group (one of four): control, ab (antibiotics), MG (Mycoplasma gallisepticum), or both (ab + MG)
MG_Treatment01	did the bird get inoculated with MG, 0 (no) or 1 (yes)
Ab_Treatment01	was the bird treated with oral antibiotics prior to MG inoculation, 0 (no) or 1 (yes)
MGC2_log	log10 value of MGC2 gene from qPCR for MG load
RawELISA	anti-MG ELISA OD value (0.0671 = seropositivity cut-off)
